# Supplementary material for: Evaluation of convalescent plasma versus standard of care for the treatment of COVID-19 in hospitalized patients: study protocol for a phase 2 randomized, open-label, controlled, multicenter trial
Source: Springer Nature journal article supplement (doi:10.1186/s13063-020-05011-9), 2021-01-20
Supplement: MOESM2 [file 18783718]

## Appendix 2: Eleven Point Ordinal Scale

0. Uninfected; no viral RNA detected.
1. Asymptomatic; viral RNA detected, limitation on activities.
2. Symptomatic; independent
3. Symptomatic; assistance needed
4. Hospitalized, no oxygen therapy.
5. Hospitalized, oxygen by mask or nasal prongs
6. Oxygen by mask or nasal prongs
7. Intubation and mechanical ventilation,  $pO_2/FiO_2 \geq 150$  or  $SpO_2/FiO_2 \geq 200$
8. Mechanical ventilation  $pO_2/FiO_2 < 150$  ( $SpO_2/FiO_2 < 200$ ) or vasopressors
9. Mechanical ventilation  $pO_2/FiO_2 < 150$  and vasopressors, dialysis, or ECMO
10. Dead
